# Supplementary material for: pH-Driven Polymorphic Behaviour of the Third PDZ Domain of PSD95: The Role of Electrostatic Interactions
Source: MDPI journal article supplement (doi:10.3390/cryst13020218), 2023-01-24
Supplement: s1 [file s1]

**Table S1.** pK<sub>a</sub> values calculated with the program PROPKA

|         | Model<br>pK <sub>a</sub> | Orthorhombic A | Orthorhombic B | Monoclinic |       | Trigonal |       |       |       |       |       |
|---------|--------------------------|----------------|----------------|------------|-------|----------|-------|-------|-------|-------|-------|
|         |                          | A              | A              | A          | B     | A        | B     | C     | D     | E     | F     |
| ASP 306 | 3.8                      | 4.00           | 2.48           | 3.99       | 3.97  |          |       |       |       |       |       |
| ASP 332 | 3.8                      | 4.02           | 3.97           | 3.97       | 4.01  | 3.96     | 3.94  | 3.96  | 3.97  | 3.98  | 3.96  |
| ASP 348 | 3.8                      | 3.18           | 3.28           | 3.26       | 3.25  | 3.30     | 3.31  | 3.29  | 3.31  | 3.30  | 3.31  |
| ASP 357 | 3.8                      | 4.11           | 3.96           | 4.18       | 4.12  | 5.57     | 5.34  | 5.47  | 5.2   | 5.44  | 5.48  |
| ASP 366 | 3.8                      | 2.43           | 2.49           | 2.34       | 2.45  | 3.21     | 1.65  | 2.17  | 2.44  | 2.18  | 2.61  |
| GLU 304 | 4.5                      | 4.57           | 3.77           | 4.58       | 4.50  |          |       |       |       |       |       |
| GLU 305 | 4.5                      | 4.69           | 4.60           | 4.65       | 4.14  |          |       |       |       |       |       |
| GLU 310 | 4.5                      | 2.83           | 4.58           | 2.79       | 2.77  | 4.61     | 4.63  | 4.62  | 4.61  | 4.49  | 4.5   |
| GLU 331 | 4.5                      | 4.91           | 4.85           | 4.85       | 4.59  | 4.75     | 4.80  | 4.85  | 4.78  | 4.81  | 4.77  |
| GLU 334 | 4.5                      | 6.68           | 5.85           | 6.73       | 5.41  | 6.71     | 6.59  | 5.58  | 5.39  | 6.67  | 5.34  |
| GLU 352 | 4.5                      | 4.75           | 4.55           | 4.76       | 4.7   | 4.53     | 4.67  | 4.61  | 4.54  | 4.46  | 4.5   |
| GLU 373 | 4.5                      | 4.62           | 4.58           | 4.59       | 4.58  | 4.60     | 4.57  | 4.61  | 4.66  | 4.61  | 4.61  |
| GLU 395 | 4.5                      | 4.45           | 3.12           | 4.37       | 4.58  | 3.48     | 3.9   | 3.74  | 4.22  | 4.11  | 4.72  |
| GLU 396 | 4.5                      | 4.30           | 4.47           | 4.44       | 4.36  | 4.32     | 4.19  | 4.14  | 4.52  | 4.43  | 3.95  |
| GLU 401 | 4.5                      | 4.32           | 4.86           | 4.41       | 4.61  | 4.25     | 4.35  | 4.68  |       | 4.24  | 5.76  |
| HIS 317 | 6.5                      | 6.26           | 6.25           | 6.27       | 6.28  | 6.24     | 6.23  | 6.26  | 6.24  | 6.22  | 6.25  |
| HIS 372 | 6.5                      | 6.92           | 6.94           | 6.89       | 6.94  | 7.00     | 6.86  | 6.73  | 6.89  | 6.96  | 6.54  |
| TYR 392 | 10                       | 10.87          | 10.05          | 9.67       | 9.93  | 10.02    | 10.22 | 9.98  | 10.25 | 10.39 | 10.13 |
| TYR 397 | 10                       | 11.03          | 11.21          | 11.06      | 11.29 | 10.96    | 10.85 | 11.04 | 10.22 | 10.96 | 10.45 |
| LYS 355 | 10.5                     | 10.31          | 10.43          | 10.31      | 10.61 | 10.22    | 10.20 | 10.41 | 10.54 | 10.23 | 10.53 |
| LYS 380 | 10.5                     | 10.32          | 10.21          | 10.31      | 10.25 | 10.25    | 10.14 | 10.22 | 10.25 | 10.22 | 10.34 |
| LYS 393 | 10.5                     | 10.19          | 10.36          | 10.06      | 10.38 | 9.73     | 10.54 | 10.63 | 10.28 | 10.13 | 9.92  |
| ARG 309 | 12.5                     | 12.32          | 12.82          | 12.37      | 12.46 | 12.78    | 12.43 | 12.38 | 12.46 | 12.54 | 12.31 |
| ARG 312 | 12.5                     | 13.59          | 13.64          | 13.47      | 13.48 | 12.64    | 12.11 | 12.58 | 12.64 | 12.66 | 12.68 |
| ARG 313 | 12.5                     | 12.39          | 12.28          | 12.34      | 12.41 | 12.34    | 12.35 | 12.35 | 12.35 | 12.34 | 12.35 |
| ARG 318 | 12.5                     | 11.94          | 12.00          | 11.97      | 11.99 | 12.03    | 11.95 | 11.95 | 12.00 | 12.00 | 12.00 |
| ARG 354 | 12.5                     | 12.24          | 12.51          | 13.59      | 13.97 | 12.54    | 12.63 | 12.61 | 12.41 | 12.44 | 12.64 |
| ARG 368 | 12.5                     | 13.12          | 13.05          | 13.2       | 13.1  | 12.41    | 14.15 | 13.59 | 13.17 | 13.54 | 13.01 |
| ARG 399 | 12.5                     | 12.6           | 14.11          | 12.7       | 12.58 | 12.57    | 12.45 | 12.5  | 12.44 | 12.46 | 12.49 |
